# Supplementary material
Source: PubMed Central journal article supplement (PMC7197026)
Supplement: NIHMS1576180-supplement-1.pdf [file NIHMS1576180-supplement-1.pdf]

## **Supplemental Materials and Methods**

### **Human cell adhesion assays**

Cell-based adhesion assays using human cell line K562 cells stably transfected with integrin CD11b/CD18 (K562 CD11b/CD18) (54) and immobilized human fibrinogen (Fg) as ligand were performed as previously described (16). Cell lines were tested and determined to be mycoplasma free. Briefly, 384-well Highbind microtiter plates were coated with 30  $\mu$ L solution of human fibrinogen (15 $\mu$ g/ml) in Phosphate Buffered Saline (PBS), pH 7.4 containing 1mM each of  $\text{Ca}^{2+}$  and  $\text{Mg}^{2+}$  ions (PBS<sup>++</sup>) overnight at 4°C overnight. To measure total input cell number, additional wells were coated with CD11b heterodimer-specific mAb IB4 (20 $\mu$ g/ml). Subsequently, the non-specific sites in the wells were blocked by incubation with 1% non-fat milk in Tris Buffered Saline (TBS), pH 7.4, at room temperature for 1h and subsequently washed three times with TBS. Human cells were suspended in the assay buffer (TBS containing 1mM each of  $\text{Ca}^{2+}$  and  $\text{Mg}^{2+}$  ions (TBS<sup>++</sup>)) and were transferred to the ligand-coated wells (30,000 cells/well). A stock solution of ADH503 was prepared in water at a concentration of 10 mM. Adhesion of K562 CD11b/CD18 cells to fibrinogen was performed for 30 min at 37°C. To dislodge non-adherent cells, the assay plates were gently inverted and kept in the inverted position for 30min at room temperature. Cells remaining adherent were fixed using formaldehyde and were quantitated using imaging microscopy, as previously described (55). For the blocking assays, cells were incubated with blocking mAb IB4 (20 $\mu$ g/ml) for 30 min at RT prior to adding them to the assay wells. Assays were performed in 4-8 replicate wells. Data shown are from one of at least two independent experiments.

### **Mouse cell adhesion assays**

Cell adhesion assays using primary mouse macrophages were performed similar to the human cell assays above, except that the assays utilized peritoneal macrophages (isolated from C57BL/6J (B6) wild type mice (#000664, The Jackson Laboratory), as described previously (54) and used mouse fibrinogen (15 $\mu$ g/ml) as an immobilized CD11b ligand. Additionally, anti-mouse CD11b antibody M1/70 was used for blocking assays. Assays were performed in 4-8 replicate wells. Data shown are from one of at least two independent experiments.

### **Assessment of ADH503 toxicity in rats and dogs.**

Sprague-Dawley rats (7-8 weeks of age, 6/sex/group) were orally administered vehicle (0.5% methylcellulose containing 0.1% Tween 80 in purified water) or ADH503 (1000 mg/kg/day, administered BID) daily for 14 consecutive days. Animals were monitored for clinical signs, changes in body weight and food consumption, effects on hematological parameters and macroscopic and microscopic

changes. Blood was collected for CBC analyses. In some studies, ADH503 was administered by oral gavage to male and female Sprague-Dawley rats (n=5/sex) at 1500 mg/kg/day for 28 consecutive days. The compound was also administered by oral gavage to male and female Beagle dogs (n=3/sex) at 1359 mg/kg/day for 28 consecutive days. The daily doses were administered in three equal increments (TID) with approximately 8 hours between the doses. Separate groups of male and female animals received vehicle alone, also given TID. Animals were observed for tolerability, adverse effects, clinical signs or toxicity during this period and none were observed.

### **Pharmacokinetics**

To evaluate the pharmacokinetics after oral administration of ADH503, Sprague-Dawley rats or C57BL/6J mice were used. ADH503 was administered at a single or multiple doses of 30-1000 mg/kg in vehicle (Tween-80 (0.02%) and 0.5% methyl cellulose in water). All animals were fasted overnight prior to dosing and through two hours postdose. Water was provided *ad libitum*. Plasma was collected at time intervals 0.25, 0.5, 1, 2, 4, 8, 10, 24, and 48 hours post-dosing. A model-independent method (Phoenix WinNonlin) was used to determine pharmacokinetic parameters for ADH503 from plasma concentration-time data.

### **Image analysis**

For all image analysis, whole slide tissues were scans were obtained at 10X or 20X magnification on Zeiss Axio Scan Z1 Brightfield/Fluorescence Slide Scanner. Additional 20X brightfield images were taken on the Nikon Eclipse 80i Epifluorescence microscope (Nikon). Whole tissue slide scans were analyzed with HALO software (Indica Labs Perkin Elmer) using Area quantification V1.0, Cytonuclear v1.5, Cytonuclear FL v1.4 module or "Immune Cell Proximity v1.2" module. Distances less than or equal to zero were culled for clarity. Finally, the normalized percentage of CD8 T cells proximal to cytokeratin 19-expressing tumor lesions was binned and quantified.

### **Fluorescence-activated cell sorting**

Normal or tumor-bearing mice were perfused with 20 mL of heparin-containing PBS. Tissues were digested in 25 mL of DMEM containing 2 mg/mL of collagenase A (Roche) and 1X DNase I (Sigma) for 30 minutes at 37°C with constant stirring. CD45<sup>+</sup> cells were enriched from single cell suspensions through MACS magnetic selection using anti-mouse CD45 microbeads (Miltenyi). Elutes were blocked with rat anti-mouse CD16/CD32 antibodies (eBioscience) (1/200) for 10 minutes, pelleted by centrifugation, and labeled with fluorophore-conjugated anti-mouse antibodies at recommended dilutions for 20 minutes on ice. Cells were filtered through 40 µm Nylon mesh, and immediately sorted using Aria-II (BD Biosciences). For microarray analyses and gene expression analyses, cells were

sorted directly into RNA lysis buffer (Omega Biotek); RNA was isolated using the EZNA kit (Omega Biotek) according to instructions by the manufacturer. For *ex vivo* assays, cells were sorted into DMEM containing 20% FBS before being pelleted and resuspended for subsequent treatments.

### **Quantitative reverse transcription-polymerase chain reaction (Q-PCR)**

Total RNA was extracted from bone marrow-derived macrophages (BM-MACs) using an E.Z.N.A. Total RNA Kit (OMEGA). cDNAs were synthesized using qScript cDNA SuperMix (QuantaBio). Quantitative real-time PCR Taqman primer probe sets specific for ARG1, YM1 and CCL2 (Applied Biosystems) were used, and the relative gene expression was determined on an ABI 7900HT quantitative PCR machine (ABI Biosystems) using Taqman Gene Expression Master Mix (Applied Biosystems). The comparative threshold cycle method was used to calculate fold changes in gene expression, which were normalized to the expression of TBP and/or GAPDH as reference genes.

### **Isolation of BM-MACs**

BM-MACs were isolated following the protocol described previously (7). Marrow cells were isolated by flushing femurs and tibias from C57BL/6J mice and cultured in RPMI-1640 medium (Gibco) containing 10% FBS and 20 ng/mL macrophage colony–stimulating factor (M-CSF, PeproTech) on plastic petri plates. After 7 days in culture, adherent macrophages were harvested for co-culture experiments. Macrophages were pretreated with ADH-503 and then co-cultured with TCM for 7 hours prior to RNA isolation.

### **Cell proliferation assay**

Cell proliferation assay was performed by using CellTiter96 Non-Radioactive Cell Proliferation Assay (Promega) according to manufacturers' instructions. Briefly, 5,000 cells/well were seeded into 96-well plates coated with 7.5 mg/mL Cultrex BME (Trevigen). At desired time points, Dye Solution was added to live cultures for 4 h at 37 °C. Absorbance was measured at 570 nm on Multiskan GO plate reader (Thermo Fisher Scientific).

Figure S1.

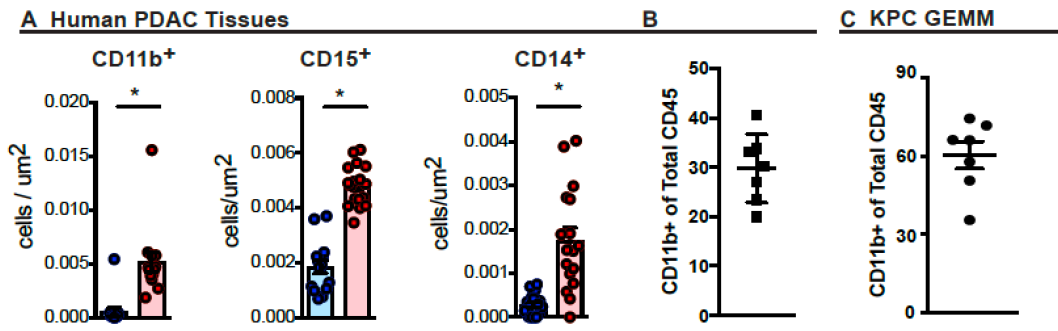

Orthotopic Murine PDAC

**D Myeloid Gating**

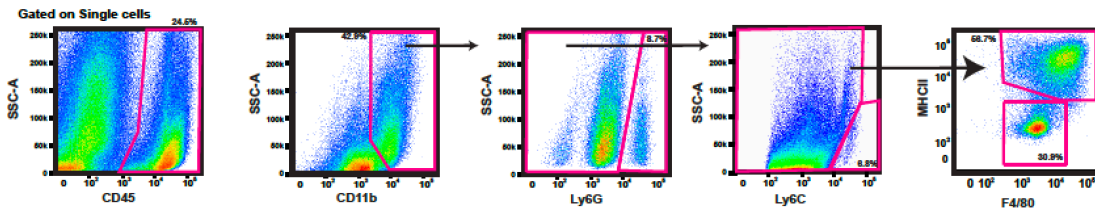

**T cell Gating**

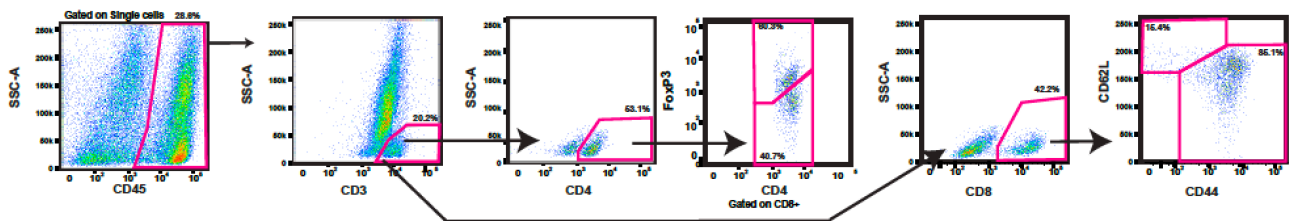

**cDC Gating**

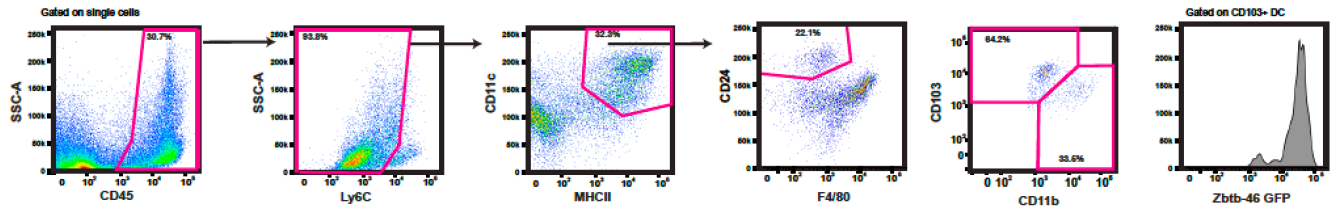

**E Human PDAC Tissues**

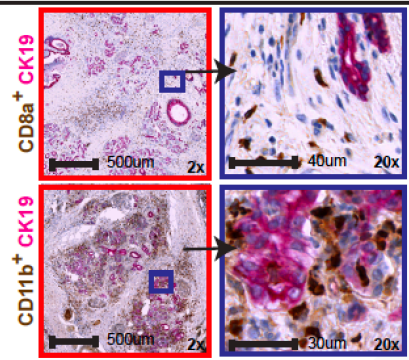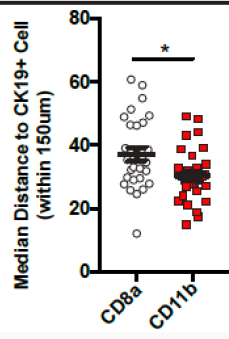

## Supplementary Figure Legends

### Supplementary Fig. 1. Pancreatic ductal adenocarcinoma has a dense CD11b<sup>+</sup> myeloid infiltrate.

**A)** IHC analysis of human PDAC and adjacent normal tissue assessed for CD11b<sup>+</sup>, CD15<sup>+</sup> and CD14<sup>+</sup> cells. Graphs show quantification of the cells (n=13 paired samples).

**B)** CD11b expression CyTOF analysis of human PDAC tissue samples. Graph depicts CD11b<sup>+</sup> as a fraction of total CD45<sup>+</sup> cells. Each dot represents an individual PDAC patient sample (n=7).

**C)** CD11b expression analysis of murine PDAC tissues. Graph depicts data from PDAC tissues of end stage KPC mice expressed as CD11b<sup>+</sup> as a fraction of total leukocytes (n=7 mice).

**D)** Representative flow cytometry gating strategies for myeloid, T cell, and cDC identification. Data are from orthotopic KP2 PDAC model. Histogram also depicts the GFP expression in CD103<sup>+</sup> cDC1s using the Zbtb-GFP reporter mice to verify cDC identify.

**E-F)** Leukocyte proximity analysis. E) Representative images of CD8a or CD11b (brown) co-staining with CK19 (pink). Mean distance (E) or number (F) of CD11b<sup>+</sup> or CD8a<sup>+</sup> cells are depicted for areas within 150um of CK19<sup>+</sup> tumor cells. (n=23 PDAC samples)

Graphs depicted as mean +/- standard error; \* denotes  $p < 0.05$  by two-sided t-test or Mann-Whitney test depending on the data distribution.

**Figure S2**

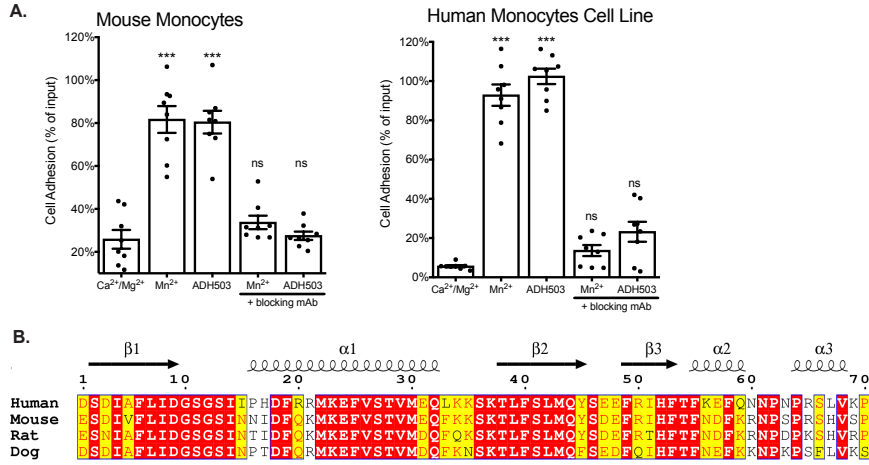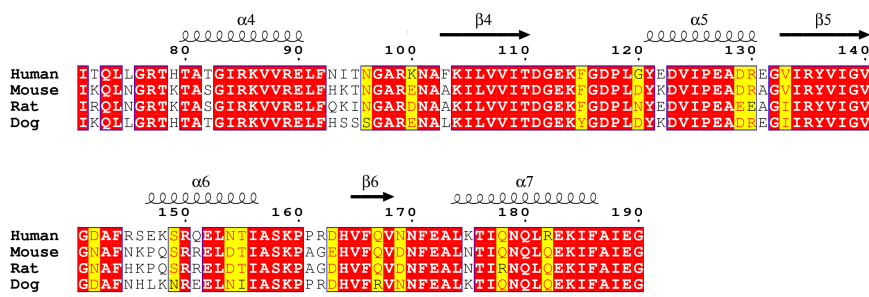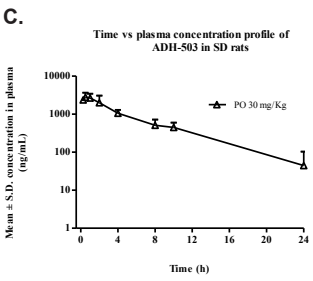

| Parameter                     | Animal Number |       |       |       | Mean  | S.D  | %CV  |
|-------------------------------|---------------|-------|-------|-------|-------|------|------|
|                               | 1             | 2     | 3     | 4     |       |      |      |
| t <sub>1/2, β</sub> (h)       | 2.84          | 2.94  | 6.38  | 3.20  | 3.84  | 1.70 | 44.2 |
| AUC <sub>0-24</sub> (ng*h/mL) | 15236         | 12826 | 18898 | 14032 | 15248 | 2624 | 17.2 |
| AUC <sub>0-∞</sub> (ng*h/mL)  | 15305         | 12887 | 20118 | 14097 | 15602 | 3169 | 20.3 |
| C <sub>max</sub> (ng/mL)      | 2026          | 2823  | 3927  | 2700  | 2869  | 788  | 27.5 |
| t <sub>max</sub> (h)          | 0.25          | 0.50  | 0.50  | 1.00  | 0.56  | 0.31 | 55.9 |

**D.** 30 mg/Kg

| Parameter                     | Day 1 |      |      | Day 5 |      |      |
|-------------------------------|-------|------|------|-------|------|------|
|                               | Mean  | S.D  | %CV  | Mean  | S.D  | %CV  |
| t <sub>1/2, β</sub> (h)       | 4.68  | 0.92 | 19.7 | 9.54  | 11.0 | 115  |
| AUC <sub>0-24</sub> (ng*h/mL) | 6817  | 1478 | 21.7 | 5952  | 2716 | 45.6 |
| AUC <sub>0-∞</sub> (ng*h/mL)  | 6950  | 1498 | 21.6 | 8206  | 3853 | 47.0 |
| C <sub>max</sub> (ng/mL)      | 1716  | 499  | 29.1 | 1900  | 574  | 30.2 |
| t <sub>max</sub> (h)          | 0.31  | 0.13 | 40.0 | 0.75  | 0.29 | 38.5 |

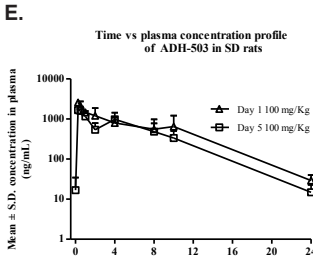

**F.** 100 mg/Kg

| Parameter                     | Day 1 |      |      | Day 5 |      |      |
|-------------------------------|-------|------|------|-------|------|------|
|                               | Mean  | S.D  | %CV  | Mean  | S.D  | %CV  |
| t <sub>1/2, β</sub> (h)       | 3.95  | 0.71 | 18.0 | 3.48  | 0.98 | 28.2 |
| AUC <sub>0-24</sub> (ng*h/mL) | 13804 | 5577 | 40.4 | 9512  | 3776 | 39.7 |
| AUC <sub>0-∞</sub> (ng*h/mL)  | 13962 | 5588 | 40.0 | 9840  | 3336 | 33.9 |
| C <sub>max</sub> (ng/mL)      | 2594  | 421  | 16.2 | 1800  | 325  | 18.1 |
| t <sub>max</sub> (h)          | 0.31  | 0.13 | 40.0 | 0.38  | 0.14 | 38.5 |

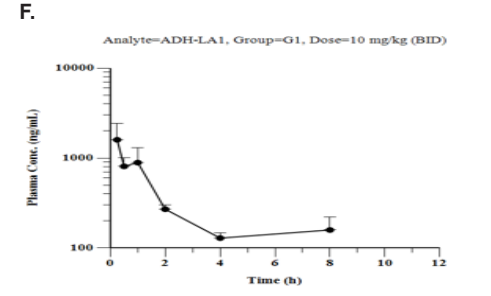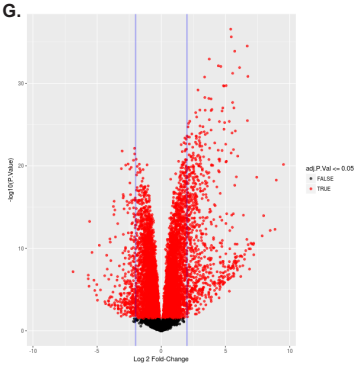

## Supplementary Fig. 2: ADH-503 in-vivo properties.

**A)** A bar graph showing relative adhesion of peritoneal mouse macrophages or human K562 cells CD11b/CD18 to immobilized CD11b ligand mouse fibrinogen (15  $\mu\text{g}/\text{mL}$ ) in the presence of  $\text{Ca}^{2+}$  and  $\text{Mg}^{2+}$  ions (physiologic, low-affinity control conditions, 1 mM each),  $\text{Mn}^{2+}$  (known non-selective integrin agonist, 1 mM), or ADH-503 (20  $\mu\text{M}$ ), or the agonists  $\text{Mn}^{2+}$  (1mM) or ADH-503 (20  $\mu\text{M}$ ) in the presence of blocking anti-CD11b antibody (M1/70 or 1B4).

**B)** Protein sequence alignment for  $\alpha\text{A}$ -domain of CD11b from human, mouse, rat, and dog.

**C)** Time vs. plasma concentration following oral administration of ADH503 to female rats. Average plasma concentration is depicted in graph (n=4 rats/group). Table depicts values for the same data set.

**D)** Plasma concentration-time data following oral gavage administration of ADH503 at 30 mg/kg in male rats on Day 1 and Day 5. Table is based on data displayed in graphical form in Figure 2C

**E)** Plasma concentration-time data following oral gavage administration of ADH503 at 100 mg/kg in male rats on Day 1 and Day 5. Table depicts values for the same data set. n=?

**F)** Plasma concentration-time data following oral gavage administration of ADH503 at 10 mg/kg in female mice. n=4/group

**G)** Volcano plot of RNA-Seq expression data on mouse bone marrow derived macrophages treated with PDAC conditioned media +/- ADH-503 for 7 hours. n=3/group

Data shown are Mean  $\pm$  the standard error of mean (SEM) from at least two independent experiments (\* $P < 0.001$ , ns= not significant, Student's t-test).

Figure S3.

A. KI Orthotopic (Day 15)

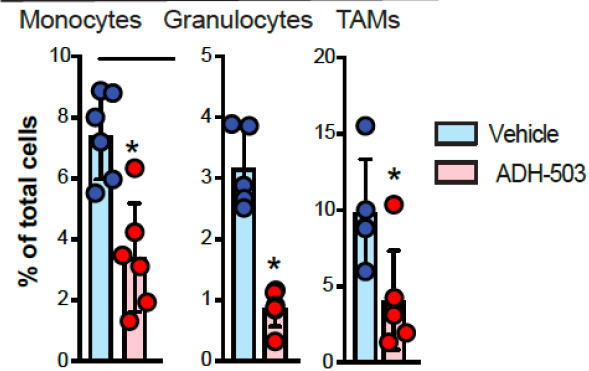

B. KI Orthotopic (Day 4)

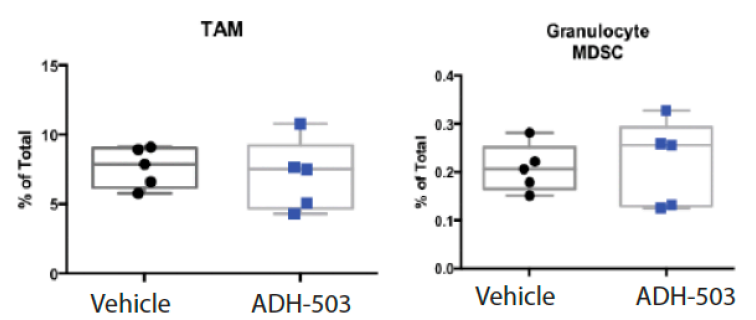

C. KP2 Orthotopic

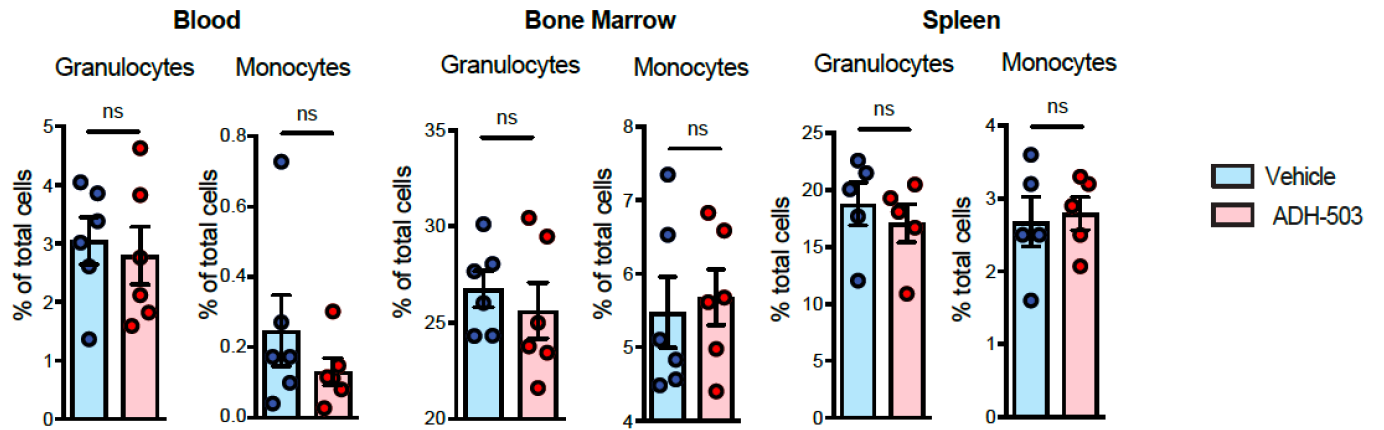

D. KP2 Orthotopic

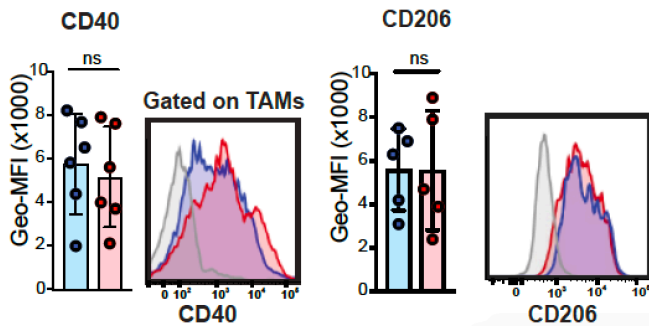



**Supplementary Fig. 3: ADH-503 alters innate responses in PDAC tissues.**

**A)** Frequency of tumor infiltrating granulocyte, monocyte, and macrophage populations in orthotopic KI PDAC tissues, after 15 days of treatment with ADH-503 or vehicle (n=6/ group).

**B)** Frequency of tumor infiltrating granulocytes and macrophages in orthotopic KI PDAC tissues, after 4 days of treatment with ADH-503 or vehicle (n=5/group).

**C)** Flow cytometry analysis of monocyte and granulocyte frequency in blood, bone marrow, and spleen of KP2 tumor-bearing mice treated with vehicle or ADH-503 for 10 days.

**D)** Flow cytometry analysis CD40 and CD206 on TAMs. Data depicted as histograms and geometric-mean fluorescent intensity (GEO-MFI) data on TAMs in orthotopic KP2 PDAC tissues from mice treated with ADH-503 or vehicle.

Graphs show the mean  $\pm$  standard error; \* denotes  $P < 0.05$  by two-sided  $t$  test or Mann-Whitney test, depending on the data distribution. All flow cytometry data are representative of at least 2 independent in vivo experiments.

**Figure S4.**

**A. Orthotopic KI**

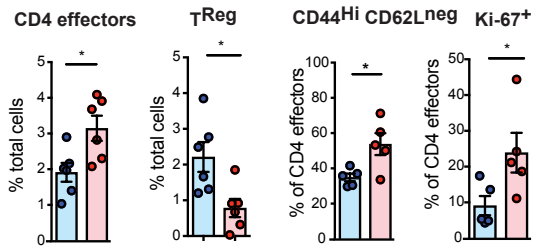

**B. Orthotopic KI**

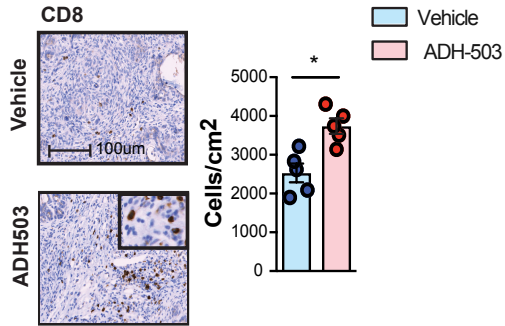

**C. KPC GEMM**

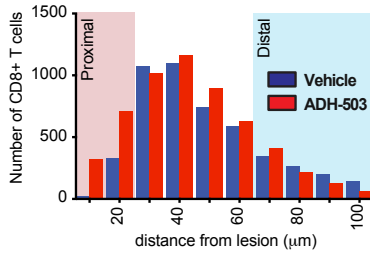

**D. Orthotopic KI**

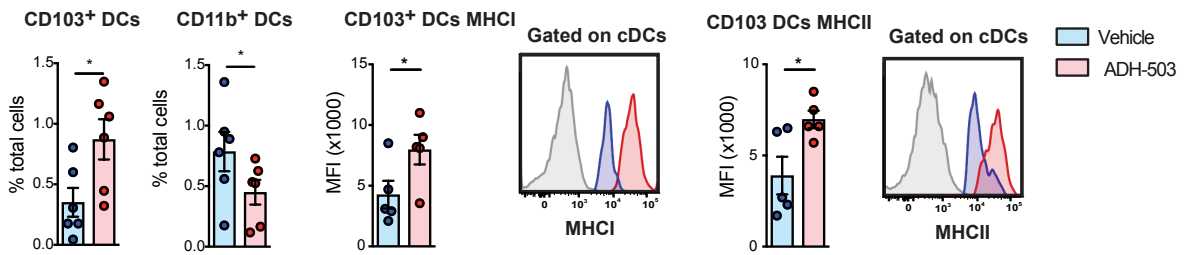

**Supplementary Fig. 4: CD11b-agonism stimulates T cell and cDC1 infiltration and function.**

**A)** Flow cytometry of tumor-infiltrating CD4<sup>+</sup> FOXP3<sup>+</sup> regulatory T cells, and FOXP3<sup>-</sup> T effectors in orthotopic KI PDAC tissues from mice treated 12 days with ADH-503 or vehicle. Graphs show the mean T cell frequency and subsets of CD4<sup>+</sup> effectors marked by CD44<sup>Hi</sup>CD62L<sup>Low</sup> or Ki-67 (n=5-6/group).

**B)** Representative IHC staining images of CD8<sup>+</sup> cells in KI tumor tissues from mice treated with vehicle or ADH-503 for 14 days (10X images). Quantification is shown in bar graphs (n=5/group).

**C)** The histogram shows the relative CD8a<sup>+</sup> cell number binned by cellular distances from CK19<sup>+</sup> cells. Analysis was done on tissue from KPC GEMMs treated with vehicle or ADH-503 (n=6/group).

**D)** Frequency of CD11b<sup>+</sup> and CD103<sup>+</sup> DCs and expression of MHC-I and MHC-II expression in CD103<sup>+</sup> cDCs in KI PDAC tissues from mice treated with vehicle or ADH-503 for 12 days. Mean cell percentages and GEO-MFI data are shown. (n=4-6)

Graphs show the mean  $\pm$  standard error; \* denotes  $P < 0.05$  by two-sided  $t$  test or Mann-Whitney test, depending on the data distribution. All flow cytometry data are representative of 2–3 independent in vivo experiments.

Figure S5

A. ADH-503 on tumor cells

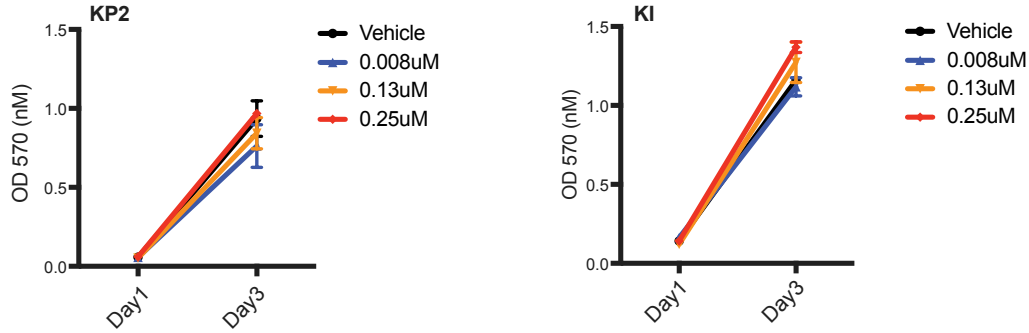

**Supplementary Fig. 5: ADH-503 direct effects on PDAC cells**

KP2 and KI tumor cells were grown on collagen and cell proliferation was measured by MTT assay in the presence of vehicle or ADH-503. n=3 assays/condition

**Figure S6**

**A. Tumor Myeloid changes**

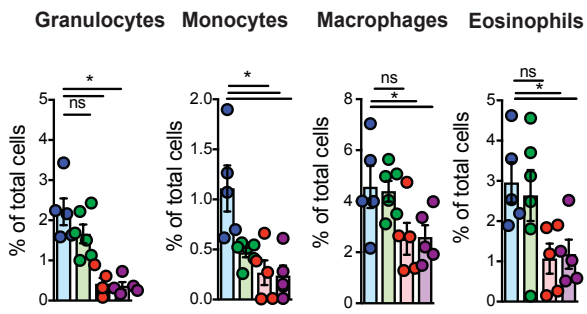

**B. Tumor T cell changes**

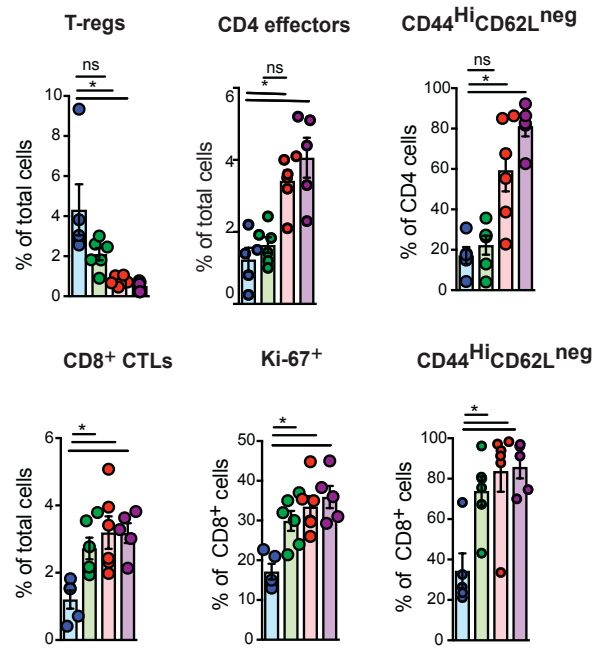

**C. CD103<sup>+</sup> DCs**

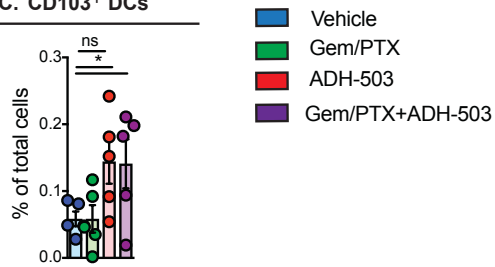

**Supplementary Fig. 6: CD11b agonism in combination with chemotherapy.**

**A)** Flow cytometric frequencies of tumor infiltrating granulocyte, monocyte, eosinophil and macrophage and cDC1s in orthotopic KrasINK model, after 12 days of treatment with ADH-503 or vehicle +/- GEM/PTX (n=5/ group).

**B-C)** Flow cytometric frequencies of tumor infiltrating CD4<sup>+</sup> and CD8<sup>+</sup> T cell and their Ki67<sup>+</sup> or CD44<sup>+</sup>CD62L<sup>-</sup> fractions in tissue from (A). (n=5/ group)

**C)** Flow cytometric frequencies of tumor infiltrating cDC1s. (n=5/ group)

Graphs show the mean  $\pm$  standard error; \* denotes  $P < 0.05$  by two-sided  $t$  test.

Figure S7

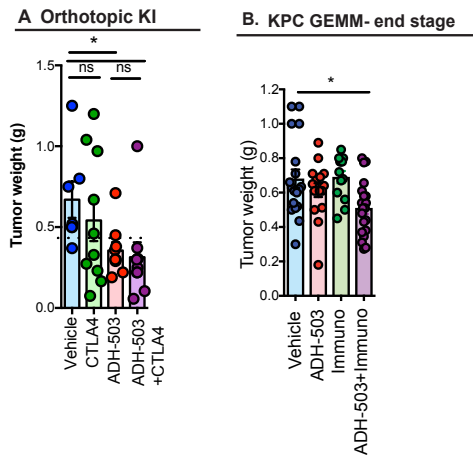



### **Supplementary Fig. 7: Tumor wet weights**

**A)** Tumor burden 14 days after treatment with vehicle or ADH-503 ± anti-CTLA4 in orthotopic KI PDAC models (n = 7-10/group).

**B)** Tumor burden from end-stage KPC mice from survival analysis in Figure 7E. “Immuno” is treatment with gemcitabine + anti-PD1 + anti-CTLA4. Mice were enrolled in the study when tumors were greater than 0.4 cm in diameter (n = 10–15/group).

Graphs show the mean ± standard error; \* denotes  $P < 0.05$  by two-sided  $t$  test.

**Table S1. Mouse Antibodies for Flow Cytometry and FACS**

| Antigen            | Clone       | Fluorophore             | Source                  |
|--------------------|-------------|-------------------------|-------------------------|
| B220               | RA3-6B2     | APC                     | BioLegend               |
| CD3                | 145-2C11    | APC, PerCP-Cy5.5, BV711 | eBioscience, BD Horizon |
| CD11b              | M1/70       | Alexa700, PE-Cy7        | eBioscience             |
| CD16/CD32          | 93          | Unconjugated            | eBioscience             |
| CD19               | eBio1D3     | APC                     | eBioscience             |
|                    | 6D5         | APC-Cy7                 | eBioscience             |
| CD40               | 1C10        | PE-Cy5                  | eBioscience             |
| CD45               | 30-F11      | PE-Cy7, APC-Cy7         | eBioscience             |
| CD80               | 16-10A1     | PE-Cy5                  | eBioscience             |
| CD86               | GL1         | PE-Cy5                  | eBioscience             |
| F4/80              | BM8         | PE-Cy5, PE              | eBioscience             |
| MHCI               | 34-1-2S     | PE                      | eBioscience             |
| MHCII              | M5/114.15.2 | eFluor450, APC-Cy7      | eBioscience             |
| PD1                | J43         | PE                      | eBioscience             |
| Ly6C               | HK1.4       | PerCP-Cy5.5, Alexa488   | eBioscience             |
| Ly6G               | 1A8         | PE                      | eBioscience             |
|                    |             | APC                     | BioLegend               |
| Ki67               | SoADH-5035  | APC                     | eBioscience             |
| CD4                | RM4-4       | FITC                    | eBioscience             |
| CD8a               | 53-6.7      | BUV-395                 | BD Horizon              |
| CD44               | IM7         | eFluor 450              | eBioscience             |
| CD62L              | MEL-14      | BV-605                  | Biolegend               |
| Tim3 (CD366)       | RMT3-23     | PE-Cy7                  | eBioscience             |
| FoxP3              | FJK-16s     | PE-Cy5                  | eBioscience             |
| Eomesodermin       | Dan11mag    | PE-Cy7                  | eBioscience             |
| CD24               | 30-F1       | FITC                    | eBioscience             |
| CD103              | 2E7         | BV-510                  | Biolegend               |
| CD11c              | N418        | APC                     | eBioscience             |
| PDL1               | MIH5        | PE                      | eBioscience             |
| NK1.1              | PK136       | BV421                   | BD Horizon              |
| CD22               | OX-97       | FITC                    | Biolegend               |
| CD49b              | DX5         | APC                     | eBioscience             |
| $\gamma\delta$ TCR | eBioGL3     | PE                      | eBioscience             |

**Table S2. Tissue IHC and IF Antibodies**

| Antigen                          | Clone               | Species               | Source             |
|----------------------------------|---------------------|-----------------------|--------------------|
| CD68<br>(1:2000)                 | Polyclonal Ab125212 | Rabbit anti-mouse     | Abcam              |
| SMA<br>(1:200)                   | ab5694              | Rabbit anti-mouse     | Abcam              |
| FAP<br>(1:200)                   | Polyclonal 2586813  | Rabbit anti-mouse     | Millipore          |
| Gr-1-biotin<br>(1:1000)          | ab25680             | Rat-biotin anti-mouse | Abcam              |
| CD8<br>(1:1000)                  | 4SM16               | Rat anti-mouse        | eBiosciences       |
| CD8a-biotin                      | 53-6.7              | Rat anti-mouse        | eBiosciences       |
| Pan-<br>Keratin-488<br>conjugate | C11                 | Mouse                 | Cell Signaling     |
| Ki67<br>(1:500)                  | Polyclonal Ab15580  | Rabbit anti-mouse     | Abcam              |
| CD11b<br>(1:100)                 | NP57                | Mouse anti-human      | Santa Cruz Biotech |
| CD14<br>(1:100)                  | ab10628             | Rabbit anti-human     | Abcam              |
| CD15<br>(1:100)                  | ab754               | Mouse anti-human      | Abcam              |
| Cleaved<br>Caspase-3<br>(1:200)  | ASP175              | Rabbit anti-mouse     | Cell Signaling     |
| CK19<br>(1:1000)                 | D4G2                | Rabbit anti-human     | Cell Signaling     |

**Table S3. Antibodies for CyTOF Staining**

| Target        | Clone       | Manufacturer | Catalog N |
|---------------|-------------|--------------|-----------|
| CD45          | HI30        | Fluidigm     | 3089003B  |
| CD3           | UCHT1       | BioLegend    | 300402_B  |
| CD19          | HIB19       | Fluidigm     | 3142001B  |
| CD81          | 5A6         | Fluidigm     | 3145007B  |
| CD64          | 10.1        | Fluidigm     | 3146006B  |
| CD20          | 2H7         | Fluidigm     | 3147001B  |
| CD16          | 3G8         | Fluidigm     | 3148004B  |
| CD34          | 581         | Fluidigm     | 3149013B  |
| CD86          | IT2.2       | Fluidigm     | 3150020B  |
| CD115         | 12-3A3-1B10 | Biolegend    | B201393   |
| CD1c          | L161        | Biolegend    | 331501    |
| CD192 (CCR2)  | K036C2      | Fluidigm     | 3153023B  |
| CD163         | GHI/61      | Fluidigm     | 3154007B  |
| CD82          | ASL-24      | Fluidigm     | 3158025B  |
| CD11c         | Bu15        | Fluidigm     | 3159001B  |
| CD14          | M5E2        | Fluidigm     | 3160001B  |
| Ki-67         | B56         | Fluidigm     | 3161007B  |
| CD80 (B7-1)   | 2D10.4      | Fluidigm     | 3162010B  |
| pcna          | PC10        | Abcam        | Ab29      |
| CD15 (SSEA-1) | W6D3        | Fluidigm     | 3164001B  |
| CD40          | 5C3         | Fluidigm     | 3165005B  |
| CD24          | ML5         | Fluidigm     | 3166007B  |
| CD38          | HIT2        | Fluidigm     | 3167001B  |
| CD206 (MMR)   | 15-2        | Fluidigm     | 3168008B  |
| CD32          | FUN-2       | Fluidigm     | 3169020B  |
| CD54          | HA58        | Fluidigm     | 3170014B  |
| CD68          | Y1/82A      | Fluidigm     | 3171011B  |
| CX3CR1        | 2A9-1       | Fluidigm     | 3172017B  |
| CD141         | 1A4         | Fluidigm     | 3173002B  |
| HLA-DR        | L243        | Fluidigm     | 3174001B  |
| CXCR4         | 12G5        | Fluidigm     | 3175001B  |
| CD56          | NCAM16.2    | Fluidigm     | 3176008B  |
| CD11b (Mac-1) | ICRF44      | Fluidigm     | 3209003B  |
